# Supplementary material for: A potential pyrrhotite (Fe7S8) anode material for lithium storage
Source: Royal Society of Chemistry journal article supplement (doi:10.1039/c4ra14819c), 2015-01-01
Supplement: c4ra14819c1.pdf [file c4ra14819c1.pdf]

## Electronic Supplementary Information (ESI)

### A potential anode material Pyrrhotite ( $\text{Fe}_7\text{S}_8$ ) for lithium storage

Kailong Zhang,<sup>a</sup> Tingwei Zhang,<sup>a</sup> Jianwen Liang,<sup>a</sup> Yongchun Zhu,<sup>\*a</sup> Ning Ling,<sup>a</sup> Yitai Qian<sup>\*a,b</sup>

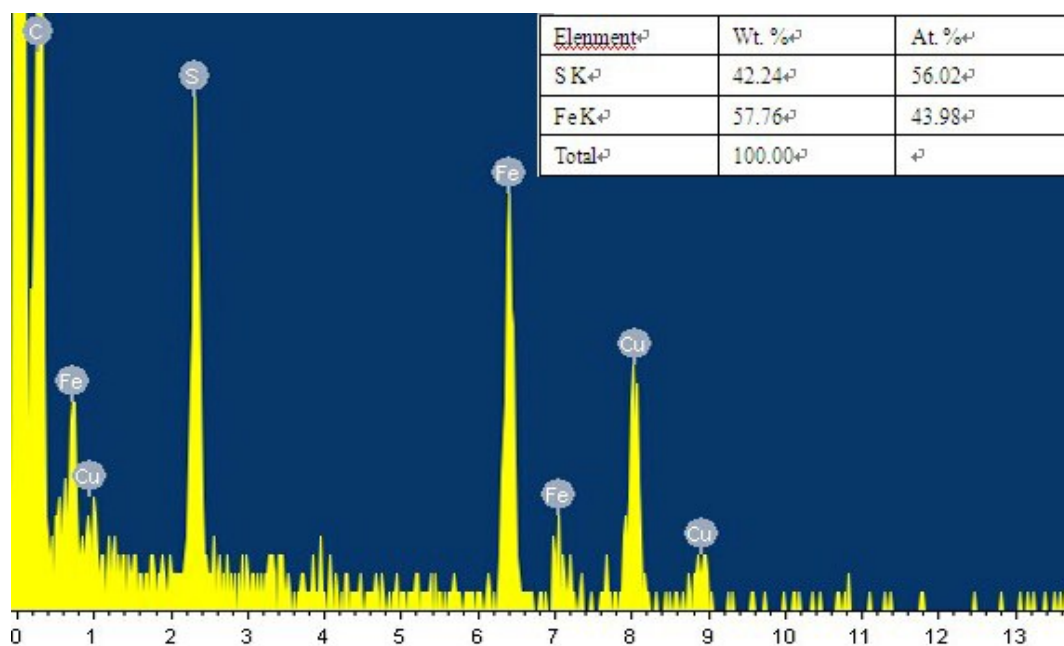

Fig .S1 The X-ray energy-dispersive spectrometer of  $\text{Fe}_7\text{S}_8@\text{C}$

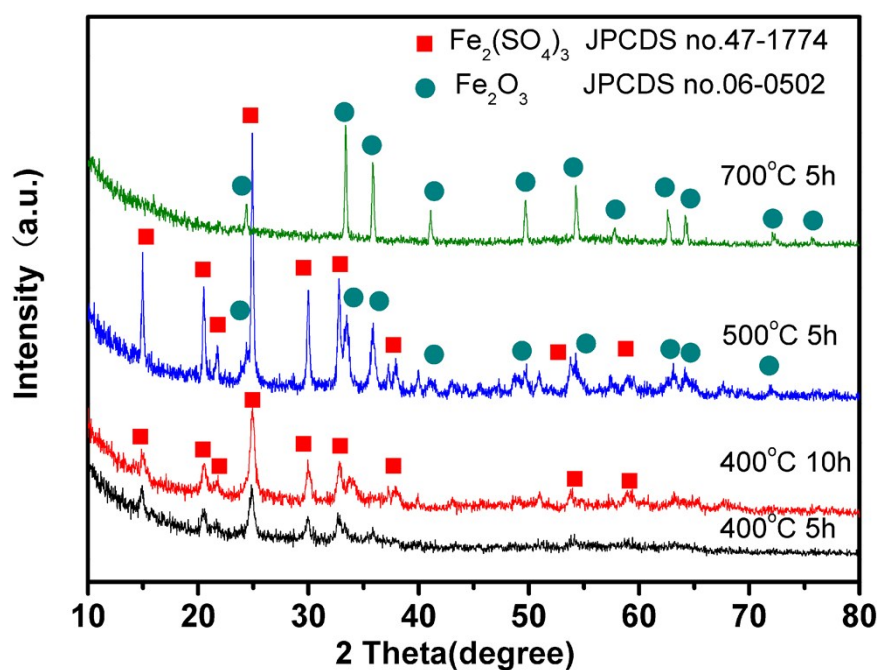

Fig .S2 XRD pattern of the oxidation product of  $\text{Fe}_7\text{S}_8@\text{C}$  obtained at different temperature for some hours (heating rate of  $10.00\text{ }^\circ\text{C min}^{-1}$ ).

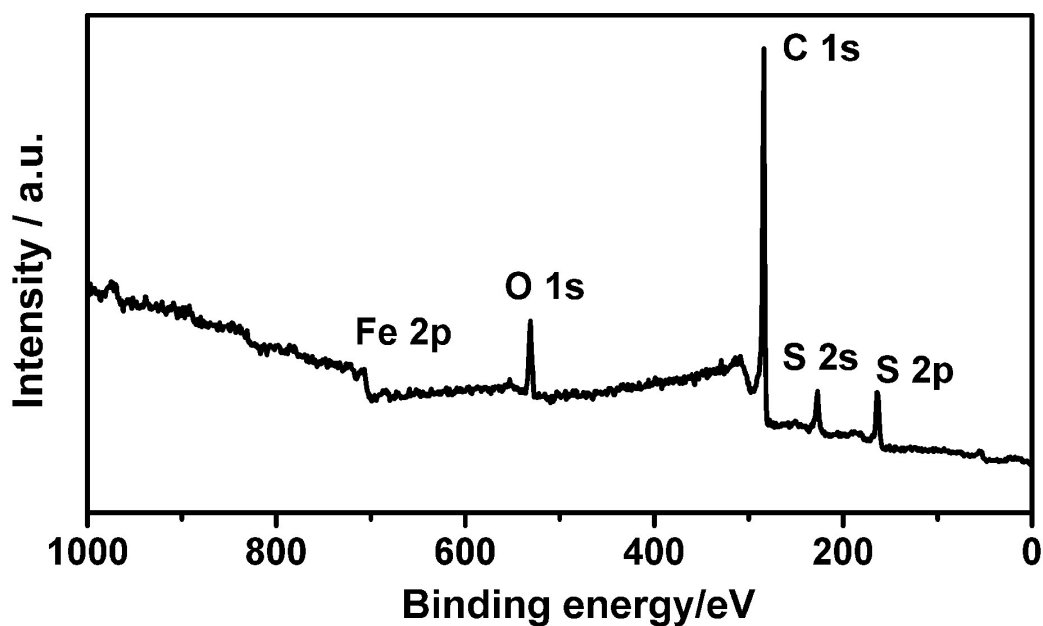

Fig .S3 The XPS of Fe<sub>7</sub>S<sub>8</sub>@C sample.

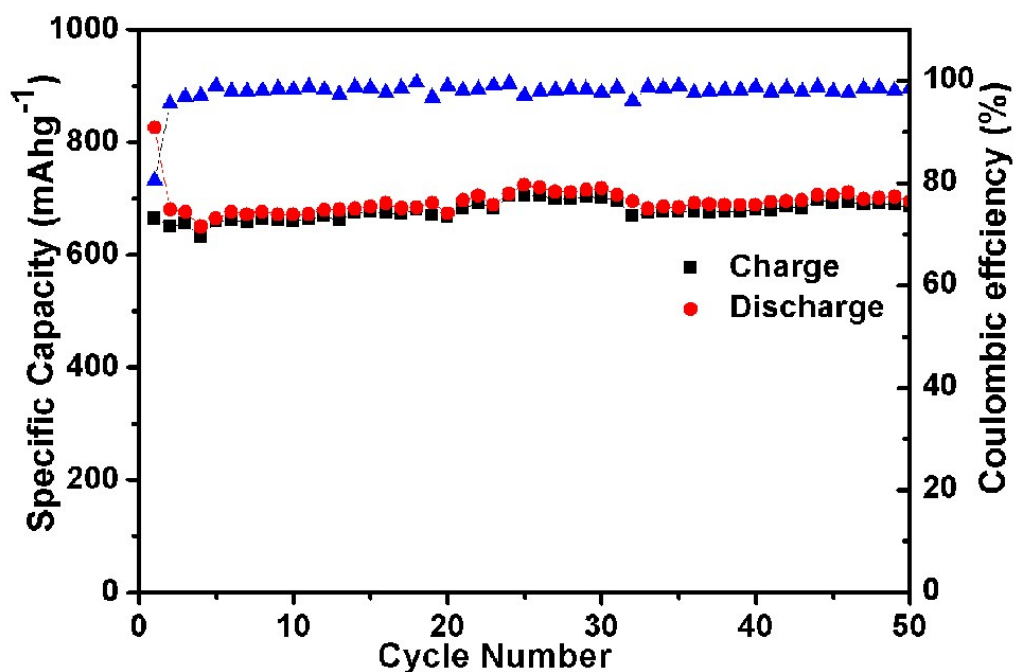

Fig .S4 Cycle performance of the Fe<sub>7</sub>S<sub>8</sub>@C composites at a current density of 0.1 A g<sup>-1</sup> between 0.01 and 3.00 V

## Experimental Information

Characterizations :

Phase characterization was characterized by X-ray powder diffraction (XRD) through a Philips X'pert X-ray diffractometer with Cu K $\alpha$  radiation ( $\lambda = 1.54182 \text{ \AA}$ ) over the range of  $10\text{-}70^\circ$  ( $2\theta$ ) at room temperature. The microstructure and morphology were

taken by transmission electron microscope (TEM, H7650), high-resolution transmission electron microscope (HRTEM, JEOL 2010) and scanning electron microscopy (SEM, EOL-JSM-6700F 20KV). The weight percentage of carbon was characterized by elemental analysis (EA, Elemental vario EL cube) at pure oxygen atmosphere. X-Ray photoelectron spectroscopy (XPS) measurements were recorded on a GESCALAB KII -ray photoelectron spectrometer. Raman spectra were recorded with an excitation laser wavelength of 514.5 nm at room temperature. Thermogravimetric analysis (TGA) was performed in air from room temperature to 800°C at a heating rate of 10°C min<sup>-1</sup> with a TGA-2050 (TA Corp.)

#### Electrochemical measurements:

The electrochemical measurements were measured with 2016 coin cells. The working electrode was prepared by coating 90 wt % active materials and 10 wt % polyvinylidene fluoride (PVDF) slurry onto a copper foil substrate. The copper foil was dried in a vacuum oven at 110 °C for 12 h. The loading of the Fe<sub>7</sub>S<sub>8</sub>@C anode material was about 2.0 mg cm<sup>-2</sup>. Li metal was used as anode, the electrolyte was 1M LiPF<sub>6</sub> with a mixed solution of diethyl carbonate (DC) and ethylene carbonate (EC) (1: 1, in wt. %). Cyclic voltammetry (CV) was carried out at a scanning rate of 0.1 mV s<sup>-1</sup> start from 1.00 to 3.00 V (vs. Li<sup>+</sup>/Li) at room temperature. The coin-cell was tested with galvanostatic cycling on a battery test system (LAND CT2001) in the voltage window of 0.01-3.00 V and in the voltage window of 1.20-2.50 V versus Li<sup>+</sup>/Li.
